# Supplementary material
Source: PubMed Central journal article supplement (PMC4412777)

HCMEC

HDMEC

HUVEC

CON IgG

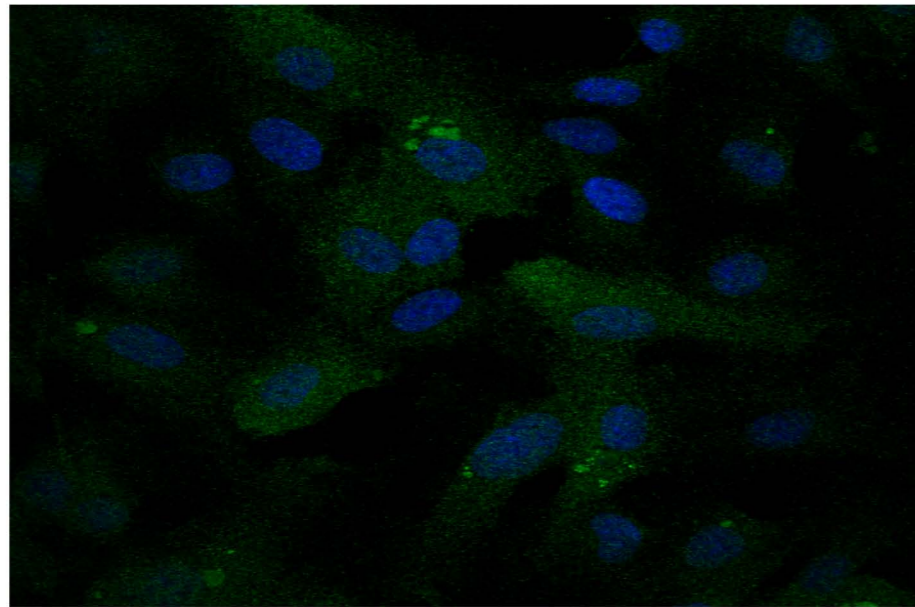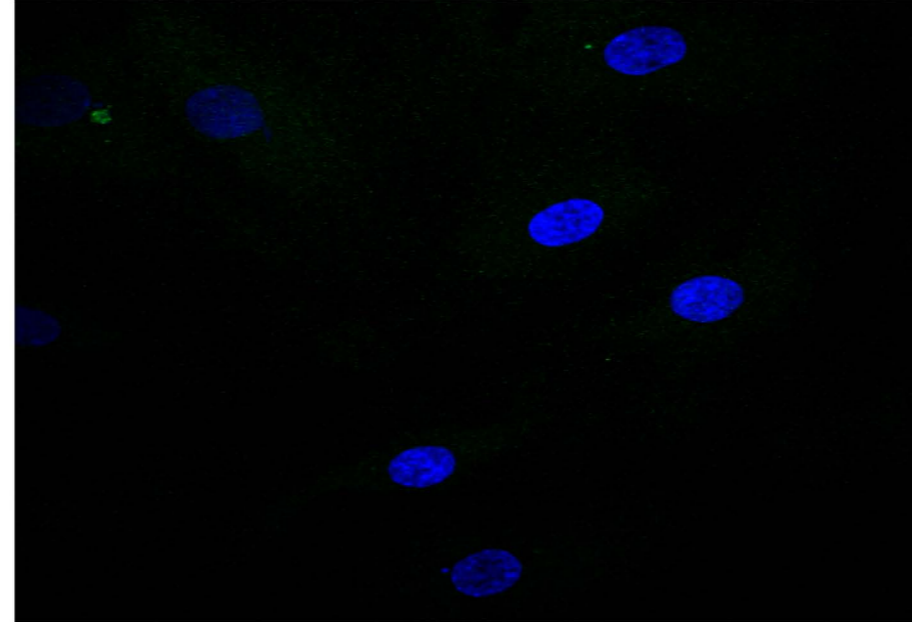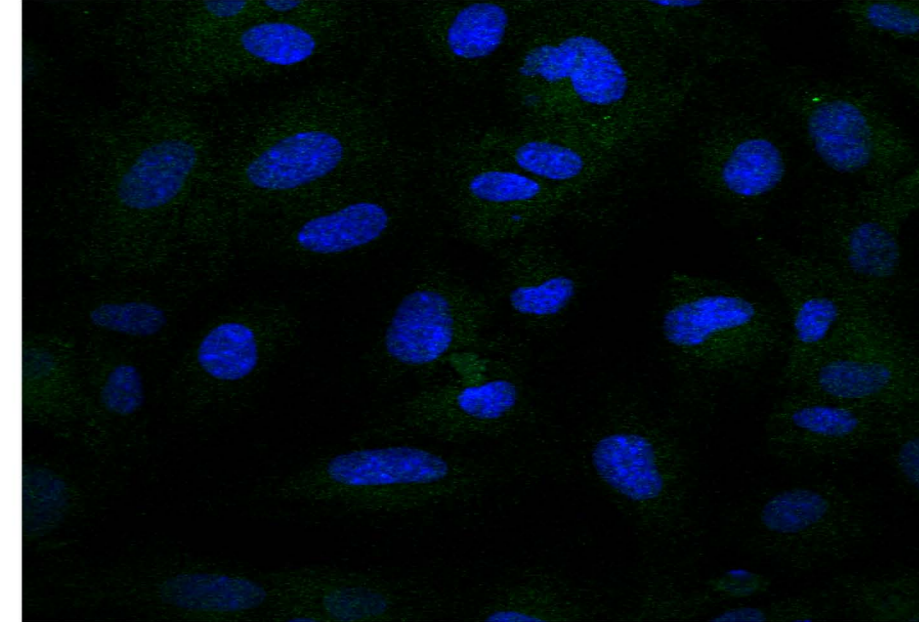

CON

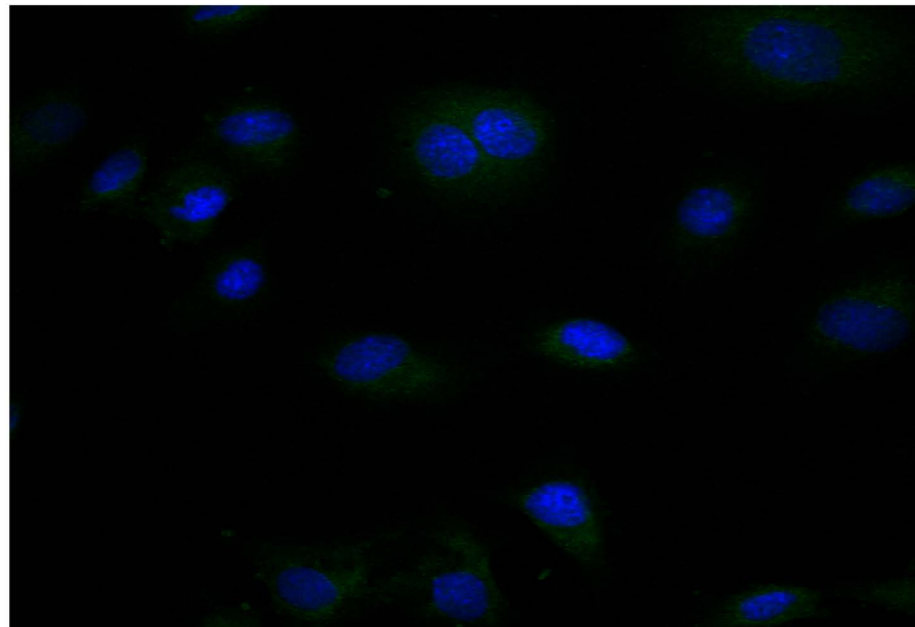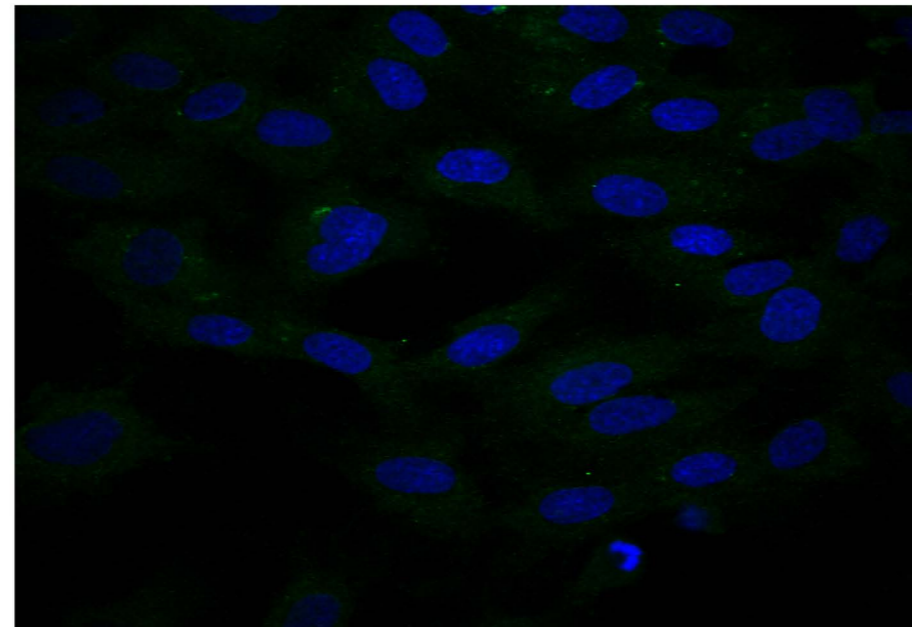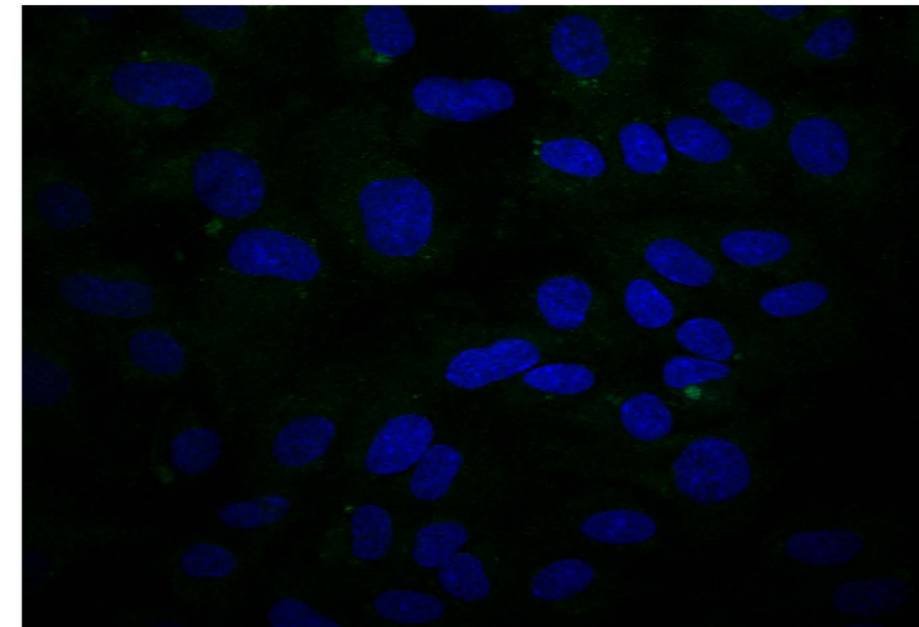

H3 H4 GAPDH H3 H4 GAPDH H3 H4 GAPDH

HCMEC

HUVEC

HDMEC

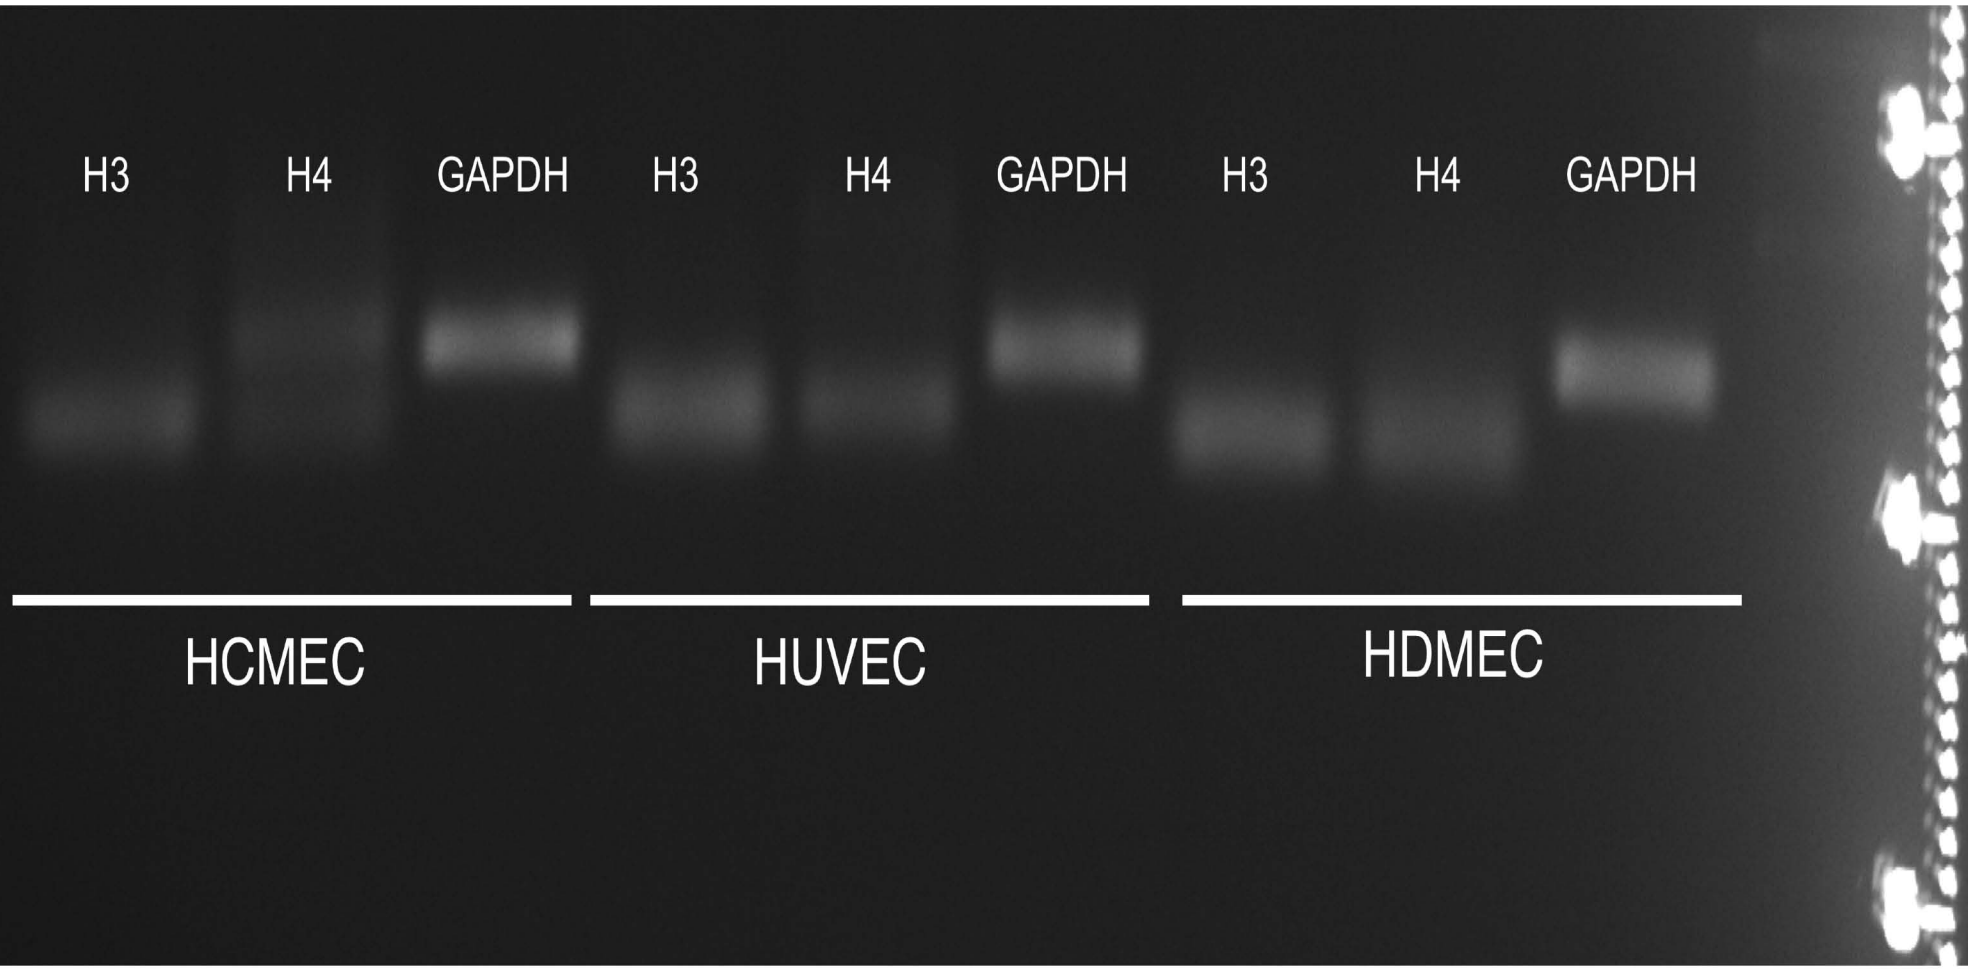

A.

HUVEC

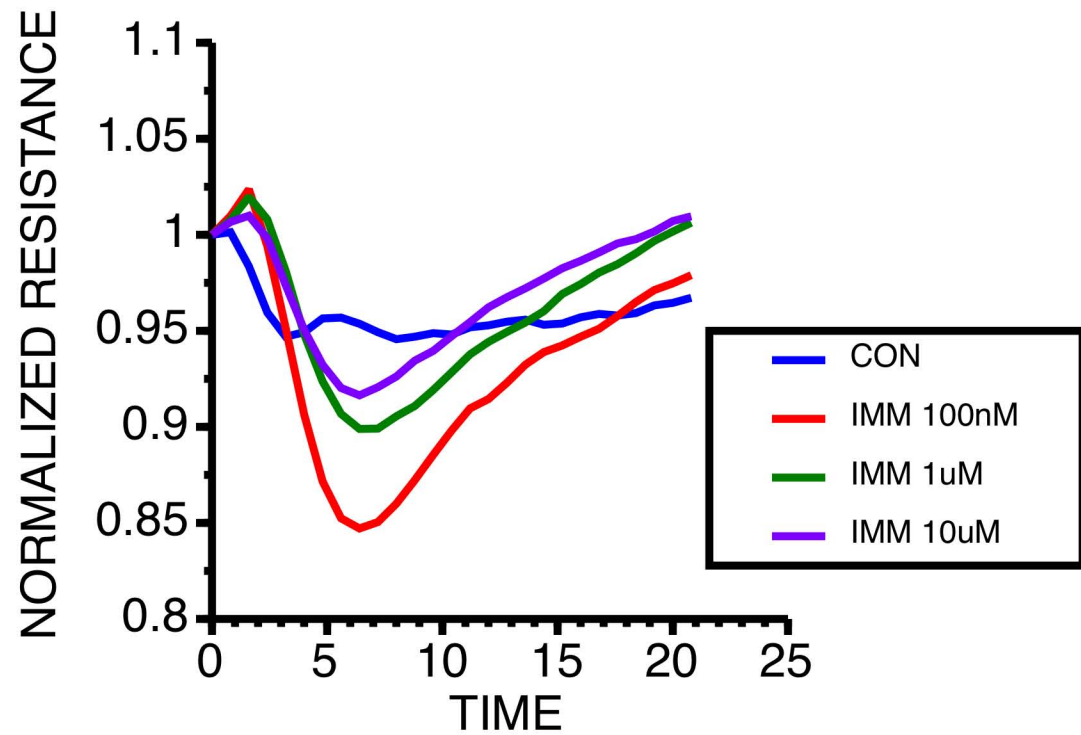

B.

HCMEC

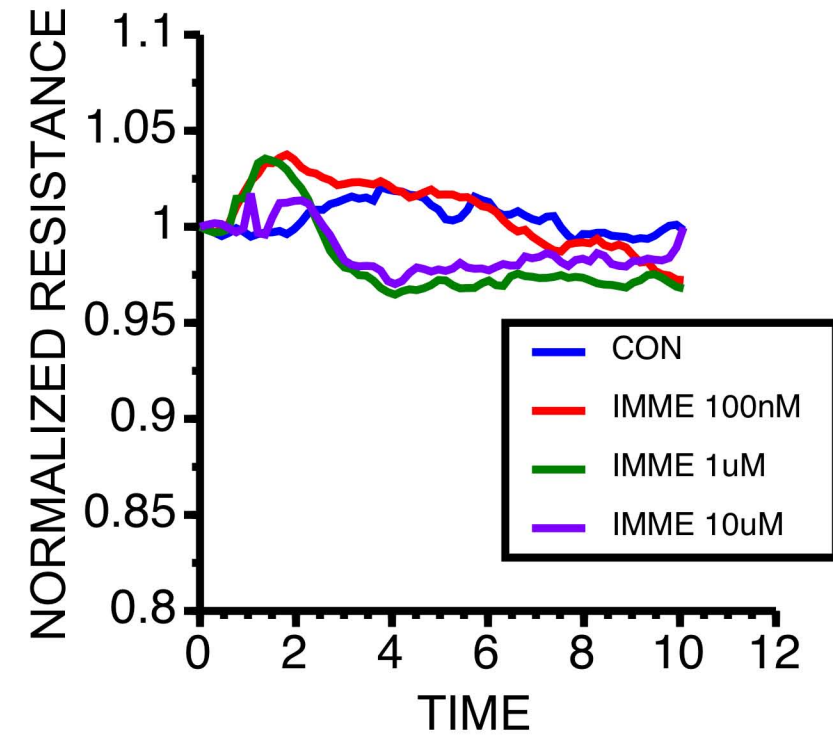

C.

HDMEC

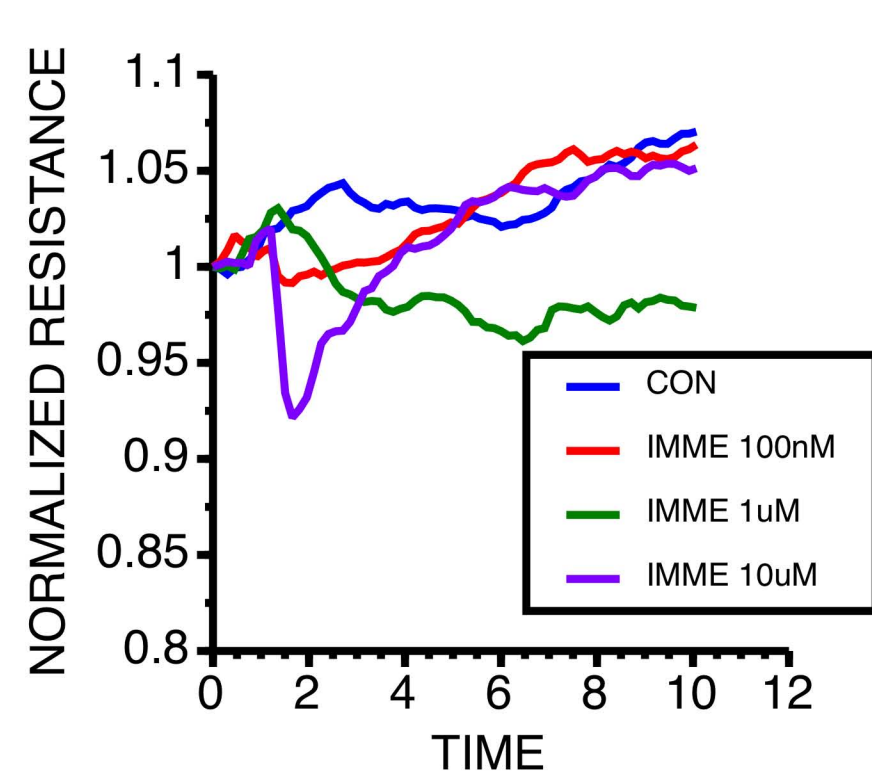

A.

 $\Delta$ RESISTANCE ( $\Omega$ )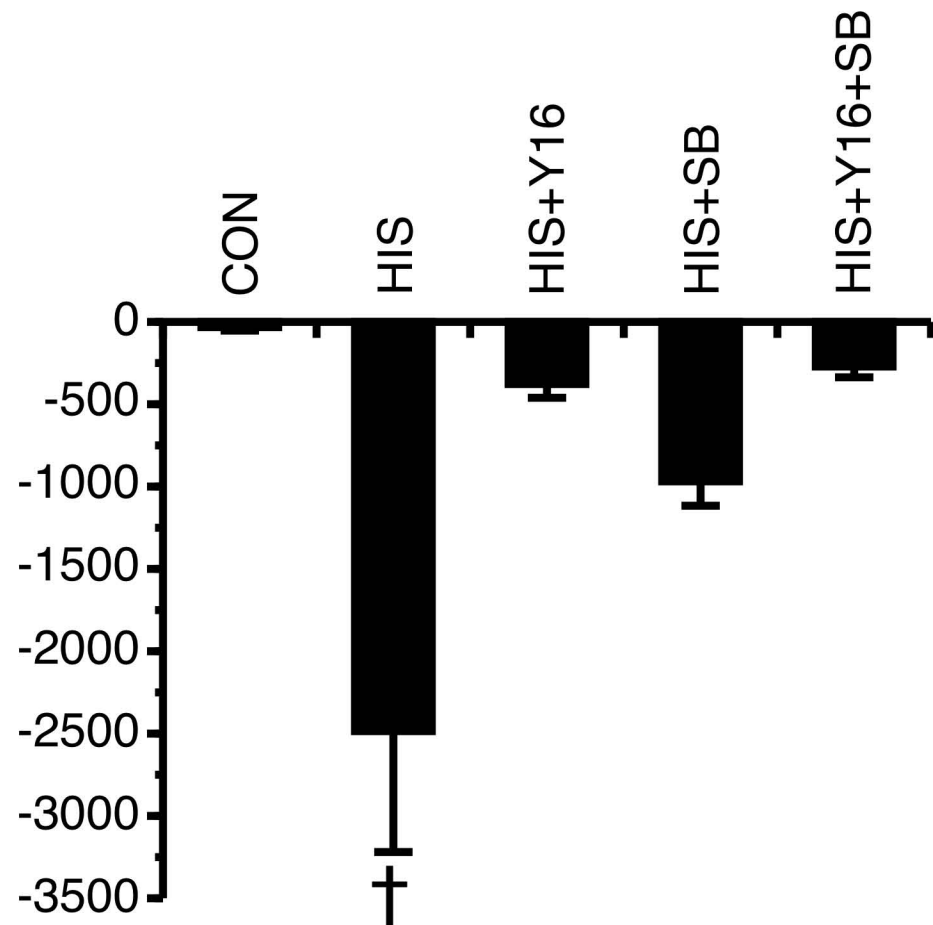

B.

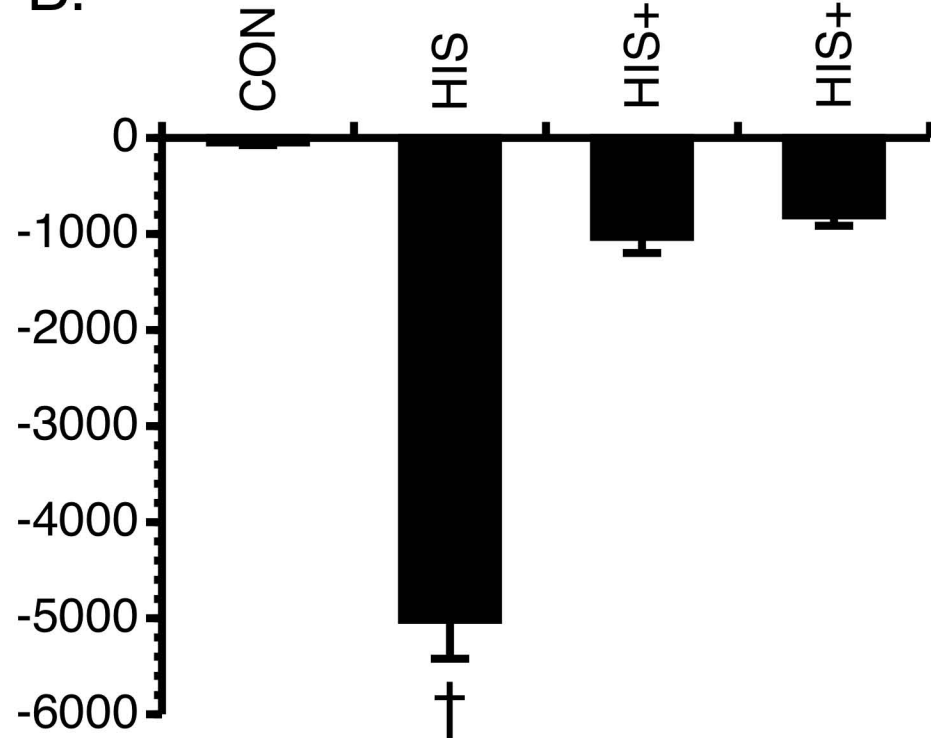

Supplement: NIHMS655358-supplement-Supp_FigureS1-S4.pdf [file NIHMS655358-supplement-Supp_FigureS1-S4.pdf]
